# Supplementary material for: Genomic signatures of near-extinction and rebirth of the crested ibis and other endangered bird species
Source: Genome Biol. 2014 Dec 11;15(12):557. doi: 10.1186/s13059-014-0557-1 (PMC4290368; doi:10.1186/s13059-014-0557-1)
Supplement: Additional file 1: Table S1. — The important events for crested ibis. Table S2. Other evidence to estimate the number of crested ibis. Table S3. Summary of avian species and genome accessions. Table S4. More detailed summary of genome assemblies of the reference crested ibis and little egret genomes. Table S5. Fosmid sequencing and assembly. Table S6. Summary of transcriptome sequencing. Table S7. Transposable elements (TE) in the genomes of the crested ibis and the little egret. Table S8. Heterozygous SNPs in 40 avian species. Table S9. Resequencing summary of the eight crested ibis and the five little egret individual animals. Table S10. SNPs of the crested ibis and the little egret. Table S11. Sample information of 105 crested ibis individuals. Table S12. Details of genes in the windows of low ZH p score in crested ibis genome. Table S13. Enrichment GO terms of genes in the windows of low ZH p score in crested ibis genome.Table S14. Details of genes in the windows of low ZH p score in crested ibis genome. Table S15. Results from model variations based on the ∂a∂i calculations. Table S16. Pseudogenes in threatened and near threatened avian carnivorous species. Table S17. Pesticide and fertilizer usage number in China (Shaanxi and Gansu province). Table S18. STR summary of DIP (crested ibis DNA identification profiling). Table S19. Population parameters of STR loci used in DIP. Table S20. Paternity test of a crested ibis pedigree. [file 13059_2014_557_MOESM1_ESM.xlsx]

## Sheet: 1
Table S1 | The important events for crested ibis
Event ID	Time (year)	Area	Description of events	Estimated number
1	1868	Japan	The beginning of Meiji Restoration. During the Meiji Restoration, traditional protection measures were disregarded and rampant hunting rapidly reduced its numbers.	50000
2	1908	Japan	It was listed as a protected species on the hunting ordinances. It was almost extinct.	26000
3	1911	Korea	People encountered a flock of several thousand of crested ibis roosting in pine trees near a pond in autumn 1911.	25000
4	1957	China	It was common in Tianshui and Wushan in Gansu province before 1955, but it then rapidly declined and was almost extinct in Gansu province by 1957.	4000
			The Asian influenza occurred in 1957.
5	1963	Russia	It is the last record in Russia.	100
6	1964	China	It is the last record in Gansu province, China.	80
7	1978	Korea	It is the last record on Korean Peninsula.	20
8	1981	China; Japan	This species is extinct in the wild in Japan,	20
			Rediscovered in the wild in Yangxian, China.
9	2003	Japan	The last surviving female died in Japan	600

## Sheet: 2
Table S2 | Other evidences to estimate the number of crested ibis
Time	Area	Events
1873	China	Large parties in late August and very large flocks in mid-November at Ningbo in Zhejiang province
1892	Korea	Common in Korea in winter and spring
1904	China	Commonest birds in the Wei He valley in Shaanxi
1929	Korea	Up to 100 birds in South Chungchong province
1934	Korea	20 birds on migration at Palmi-do island
1936	Korea	10 birds at the zoological garden in Seoul
1940s	China	Hundreds of crested ibis could be seen roosting in the same tree and that more than 30 nests could sometimes be found on the same tree
1953	Japan	23 in Sado and 8 in Noto
Before 1955	China	Common in Ganshu
Until 1958	China	Japanese businessmen imported crested ibis feathers from northeast china and after 1960 no feathers were imported.
1959	Japan	4 in Noto and 6 in Sado
1965	Korea	10 birds in South Pyongan province
1966	Korea	Two or three birds were seen in the Demilitarised Zone
1971	Japan	Extinct in Noto
The data set was from the Book “Threatened Birds of Asia: The BirdLife International Red Data Book”, edited by N. J. COLLAR).

## Sheet: 3
Table S3 | Summary of avian species and genome accessions.
					Genome accessions
No.	Latin names	Species common name	Order, Family	Conservation status	Source of genomes	BioProject ID	SRA ID	Study ID	Assembly Accession	Sequence WGS master accession	GigaScience
1	Nipponia nippon	Crested ibis	Ciconiiformes, Threskiorothidae	EV (EN)	BGI & Xi’an Jiaotong University	PRJNA232572	SRA122361	SRP035852	GCA_000708225.1	JMFH00000000.1	http://dx.doi.org/10.5524/101003
2	Egretta garzetta	Little Egret	Ciconiiformes, Ardeidae	LC	BGI & Xi’an Jiaotong University	PRJNA232959	SRA123137	SRP035853	GCA_000687185.1	JJRC00000000.1	http://dx.doi.org/10.5524/101002
3	Balearica regulorum	Grey crowned-crane	Gruiformes	EV (EN)	Zhang et al., Comparative Genomics Across Modern Bird Species Reveal Insights into Avian Genome evolution and Adaptation. (Submitted)	PRJNA212879	SRA097970	SRP028839	GCA_000709895.1	JJRR00000000.1	http://dx.doi.org/10.5524/101017
4	Haliaeetus albicilla	White-tailed Eagle	Accipitriiformes	EV (once-EN)	Zhang et al	PRJNA212896	SRA098868	SRP029203	GCA_000691405.1	JJRL00000000.1	http://dx.doi.org/10.5524/101027
5	Haliaeetus leucocephalus	Bald Eagle	Accipitriformes	EV (once-EN)	Wes Warren at Wash U Zhang et al	PRJNA237821	SRX475899, SRX475900, SRX475901, SRX475902	SRP038924	GCA_000737465.1	JPRR00000000.1	http://dx.doi.org/10.5524/101040
6	Chlamydotis macqueenii	MacQueen's Bustard	Otidiformes	EV (VU)	Zhang et al	PRJNA212891	SRA098203	SRP028950	GCA_000695195.1	JMFJ00000000.1	http://dx.doi.org/10.5524/101022
7	Mesitornis unicolor	Brown Mesite	Mesitornithiformes	EV (VU)	Zhang et al	PRJNA212899	SRA099409	SRP029309	GCA_000695765.1	JJRI00000000.1	http://dx.doi.org/10.5524/101030
8	Nestor notabilis	Kea	Psittaciformes	EV (VU)	Zhang et al	PRJNA212900	SRA099410	SRP029311	GCA_000696875.1	JJRH00000000.1	http://dx.doi.org/10.5524/101031
9	Pelecanus crispus	Dalmatian Pelican	Pelecaniformes	EV (VU)	Zhang et al	PRJNA212901	SRA099411	SRP029331	GCA_000687375.1	JJRG00000000.1	http://dx.doi.org/10.5524/101032
10	Acanthisitta chloris	Rifleman	Passeriformes	LC	Zhang et al	PRJNA212877	SRA097960	SRP028832	GCA_000695815.1	JJRS00000000.1	http://dx.doi.org/10.5524/101015
11	Anas platyrhynchos	Pekin Duck	Anseriformes	LC	Huang Y, Li Y, Burt DW, Chen H, Zhang Y, Qian W, Kim H, Gan S, Zhao Y, Li J, et al: The duck genome and transcriptome provide insight into an avian influenza virus reservoir species. Nat Genet 2013, 45:776-783	PRJNA46621	SRA010308	SRP001571	GCA_000355885.1	ADON00000000.1	http://dx.doi.org/10.5524/101001
12	Apaloderma vittatum	Bar-tailed Trogon	Trogoniformes	LC	Zhang et al	PRJNA212878	SRA097967	SRP028834	GCA_000703405.1	JMFV00000000.1	http://dx.doi.org/10.5524/101016
13	Calypte anna	Anna's Hummingbird	Apodiformes	LC	Zhang et al	PRJNA212866	SRA096094	SRP028275	GCA_000699085.1	JJRV00000000.1	http://dx.doi.org/10.5524/101004
14	Antrostomus carolinensis	Chuck-will's-widow	Caprimulgiformes	LC	Zhang et al	PRJNA212888	SRA098079	SRP028883	GCA_000700745.1	JMFU00000000.1	http://dx.doi.org/10.5524/101019
15	Cariama cristata	Red-legged Seriema	Cariaiformes	LC	Zhang et al	PRJNA212889	SRA098089	SRP028884	GCA_000690535.1	JJRQ00000000.1	http://dx.doi.org/10.5524/101020
16	Cathartes aura	Turkey Vulture	Accipitriformes	LC	Zhang et al	PRJNA212890	SRA098145	SRP028913	GCA_000699945.1	JMFT00000000.1	http://dx.doi.org/10.5524/101021
17	Charadrius vociferus	Killdeer	Charadriiformes	LC	Zhang et al	PRJNA212867	SRA096158	SRP028286	GCA_000708025.2	JMFX00000000.2	http://dx.doi.org/10.5524/101007
18	Colius striatus	Speckled Mousebird	Coliiformes	LC	Zhang et al	PRJNA212892	SRA098342	SRP028965	GCA_000690715.1	JJRP00000000.1	http://dx.doi.org/10.5524/101023
19	Columba livia	Pigeon	Columbiformes	LC	Shapiro MD, Kronenberg Z, Li C, Domyan ET, Pan H, Campbell M, Tan H, Huff CD, Hu H, Vickrey AI, et al: Genomic Diversity and Evolution of the Head Crest in the Rock Pigeon. Science 2013, 339:1063-1067	PRJNA167554	SRA054954	SRP013894	GCA_000337935.1	AKCR00000000.1	http://dx.doi.org/10.5524/100007
20	Corvus brachyrhynchos	American Crow	Passeriformes	LC	Zhang et al	PRJNA212869	SRA096200	SRP028317	GCA_000691975.1	JMFN00000000.1	http://dx.doi.org/10.5524/101008
21	Cuculus canorus	Common Cuckoo	Cuculiformes	LC	Zhang et al	PRJNA212870	SRA096365	SRP028349	GCA_000709325.1	JNOX00000000.1	http://dx.doi.org/10.5524/101009
22	Eurypyga helias	Sunbittern	Eurypygiformes	LC	Zhang et al	PRJNA212893	SRA098749	SRP029147	GCA_000690775.1	JJRO00000000.1	http://dx.doi.org/10.5524/101024
23	Falco peregrinus	Peregrine Falcon	Falconiformes	LC	Zhan X, Pan S, Wang J, Dixon A, He J, Muller MG, Ni P, Hu L, Liu Y, Hou H, et al: Peregrine and saker falcon genome sequences provide insights into evolution of a predatory lifestyle. Nat Genet 2013, 45:563-566	PRJNA159791	SRA055082	SRP013939	GCA_000337955.1	AKMT00000000.1	http://dx.doi.org/10.5524/101006
24	Fulmarus glacialis	Northern Fulmar	Procellariiformes	LC	Zhang et al	PRJNA212894	SRA098806	SRP029180	GCA_000690835.1	JJRN00000000.1	http://dx.doi.org/10.5524/101025
25	Gavia stellata	Red-throated Loon	Gaviiformes	LC	Zhang et al	PRJNA212895	SRA098829	SRP029187	GCA_000690875.1	JJRM00000000.1	http://dx.doi.org/10.5524/101026
26	Geospiza fortis	Medium Ground-finch	Passeriformes	LC	Zhang et al	PRJNA156703	SRA051234	SRP011940	GCA_000277835.1	AKZB00000000.1	http://dx.doi.org/10.5524/100040
27	Leptosomus discolor	Cuckoo-roller	Leptosomatiformes	LC	Zhang et al	PRJNA212897	SRA098894	SRP029206	GCA_000691785.1	JJRK00000000.1	http://dx.doi.org/10.5524/101028
28	Manacus vitellinus	Golden-collared Manakin	Passeriformes	LC	Zhang et al	PRJNA212872	SRA096507	SRP028393	GCA_000692015.2	JMFM00000000.2	http://dx.doi.org/10.5524/101010
29	Melopsittacus undulatus	Budgerigar	Psittaciformes	LC	Ganapathy G, Howard JT, Ward JM, Li J, Li B, Li Y, Xiong Y, Zhang Y, Zhou S, Schwartz DC, Schatz M, Aboukhalil R, Fedrigo O, Bukovnik L, Wang T, Wray G, Rasolonjatovo I, Winer R, Knight JR, Koren S, Warren WC, Zhang G, Phillippy AM, Jarvis ED. High-coverage sequencing and annotated assemblies of the budgerigar genome. (2014) Gigascience. 3:11. doi: 10.1186/2047-217X-3-11.	PRJEB1588	ERA200248	ERP002324	GCA_000238935.1	AGAI00000000.1	http://dx.doi.org/10.5524/100059
30	Merops nubicus	Carmine Bee-eater	Coraciiformes	LC	Zhang et al	PRJNA212898	SRA099305	SRP029278	GCA_000691845.1	JJRJ00000000.1	http://dx.doi.org/10.5524/101029
31	Ophisthocomus hoazin	Hoatzin	Ophisthocomiformes	LC	Zhang et al	PRJNA212873	SRA096539	SRP028409	GCA_000692075.1	JMFL00000000.1	http://dx.doi.org/10.5524/101011
32	Phaethon lepturus	White-tailed Tropicbird	Phaethoniformes	LC	Zhang et al	PRJNA212902	SRA099412	SRP029342	GCA_000687285.1	JJRF00000000.1	http://dx.doi.org/10.5524/101033
33	Phalacrocorax carbo	Great Cormorant	Pelecaniformes	LC	Zhang et al	PRJNA212903	SRA099413	SRP029344	GCA_000708925.1	JMFI00000000.1	http://dx.doi.org/10.5524/101034
34	Phoenicopterus ruber	American Flamingo	Phoenicopteriformes	LC	Zhang et al	PRJNA212904	SRA099414	SRP029345	GCA_000687265.1	JJRE00000000.1	http://dx.doi.org/10.5524/101035
35	Picoides pubescens	Downy Woodpecker	Piciformes	LC	Zhang et al	PRJNA212874	SRA097131	SRP028625	GCA_000699005.1	JJRU00000000.1	http://dx.doi.org/10.5524/101012
36	Podiceps cristatus	Great Crested Grebe	Podicipediformes	LC	Zhang et al	PRJNA212905	SRA099415	SRP029346	GCA_000699545.1	JMFS00000000.1	http://dx.doi.org/10.5524/101036
37	Pterocles gutturalis	Yellow-throated Sandgrouse	Pteroclidiformes	LC	Zhang et al	PRJNA212906	SRA099416	SRP029347	GCA_000699245.1	JMFR00000000.1	http://dx.doi.org/10.5524/101037
38	Struthio camelus	Common Ostrich	Struthioniformes	LC	Zhang et al	PRJNA212875	SRA097407	SRP028745	GCA_000698965.1	JJRT00000000.1	http://dx.doi.org/10.5524/101013
39	Tauraco erythrolophus	Red-crested Turaco	Musophagiformes	LC	Zhang et al	PRJNA212908	SRA099418	SRP029348	GCA_000709365.1	JNOY00000000.1	http://dx.doi.org/10.5524/101038
40	Tyto alba	Barn Owl	Strigiformes	LC	Zhang et al	PRJNA212909	SRA099419	SRP029349	GCA_000687205.1	JJRD00000000.1	http://dx.doi.org/10.5524/101039
41	Aptenodytes forsteri	Emperor Penguin	Sphenisciformes	NT	Zhang et al; Li et al 2014 GigaScience	PRJNA235982	SRA129317	SRP035855	GCA_000699145.1	JMFQ00000000.1	http://dx.doi.org/10.5524/100005
42	Chaetura pelagica	Chimney Swift	Apodiformes	NT	Zhang et al	PRJNA210808	SRA092327	SRP026688	GCA_000747805.1	AVOS00000000.1	http://dx.doi.org/10.5524/101005
43	Pygoscelis adeliae	Adelie Penguin	Sphenisciformes	NT	Zhang et al; Li et al 2014 GigaScience	PRJNA235983	SRA129318	SRP035856	GCA_000699105.1	JMFP00000000.1	http://dx.doi.org/10.5524/100006
We classified recently Endangered (EN) and Vulnerable (VU) into endangered-vulnerable (EV) for the convenience of genetic analysis. LC stands for least concern. Red = published prior to Zhang et al 2014

## Sheet: 4
Table S4 | More detailed summary of genome assemblies of the reference crested ibis and little egret genomes
crested ibis (v2)
	Contig size (bp)	# of contig	Scaffold size (bp)	# of scaffold
N90	13264	20342	976801	163
N80	25597	13761	3379560	97
N70	38038	9817	5768058	69
N60	51728	7036	7507415	50
N50	67771	4946	10687076	36
Longest	697525	1	37192118	1
Total size	1238154125		1263874793
crested ibis (v1)
	Contig size (bp)	# of contig	Scaffold size (bp)	# of scaffold
N90	5541	56325	546933	324
N80	9807	40368	1724600	189
N70	13780	30055	2822152	133
N60	17792	22366	3962645	95
N50	22194	16297	5085187	68
Longest	205902	1	27015053	1
Total size	1205773679		1240309383
little egret
	Contig size (bp)	# of contig	Scaffold size (bp)	# of scaffold
N90	5660	51570	647973	439
N80	10070	36498	1174251	303
N70	14369	26892	1710257	221
N60	18894	19849	2303798	160
N50	23879	14379	3051370	114
Longest	227044	1	14638873	1
Total size	1162195175		1211513874
Most analysis was based on the first version (v1).

## Sheet: 5
Table S5 | Fosmid sequencing and assembly
Fosmid ID	# of High quality reads	Reads average length (bp)	# Scaffold	# Contig	Contig length (bp)	Total reads coverage
blzaxa	429	734	1	2	38110	7.7
blzbxa	448	679	1	1	38192	7.9
blzdxa	427	715	1	2	38937	7.8
blzexa	604	646	1	2	36504	9.6
blzfxa	664	686	1	1	42382	9
blzgxa	419	642	1	3	42821	5.8
blzhxa	422	643	1	1	40594	6.7
blzjxa	381	636	1	3	33785	6.5

## Sheet: 6
Table S6 | Summary of transcriptome sequencing
Samples	Total reads (Mb)	Total bases (Gb)	Mapped reads	Mapped reads (%)	Mapped bases (Gb)	Mapped bases (%)	Genome coverage (%)
			(Mb)
Ci-623-2A	80.28	7.23	57.03	71.04	4.42	61.19	5.3
Xiong-44-2A	74.21	6.68	50.71	68.34	3.89	58.25	5

## Sheet: 7
Table S7 | Transposable elements (TE) in the genomes of the crested ibis and the little egret
		Repbase TE		TE proteins		RepeatModeler		Combined
		Length (Mb)	% genome	Length (Mb)	% genome	Length (Mb)	% genome	Length (Mb)	% genome
crested ibis	DNA	3	0.2	0.3	0	0.3	0	3.2	0.3
	LINE	41.8	3.5	32.3	2.7	43	3.6	49.3	4.1
	LTR	14.5	1.2	1.9	0.2	14.1	1.2	16.3	1.4
	SINE	2.5	0.2	0	0	0.1	0	2.8	0.2
	Other	0	0	0	0	0	0	0	0
	Unknown	0.8	0.1	0	0	8.2	0.7	9.1	0.8
	Total	62.2	5.2	34.6	2.9	66.8	5.5	80	6.6
little egret	DNA	2.5	0.2	0.2	0	0.2	0	2.7	0.2
	LINE	51.1	4.4	41.6	3.6	50	4.3	57.3	4.9
	LTR	15.6	1.3	2	0.2	14.8	1.3	17.1	1.5
	SINE	2.2	0.2	0	0	0.6	0	2.2	0.2
	Other	0	0	0	0	0	0	0	0
	Unknown	0.8	0.1	0	0	6.9	0.6	7.7	0.7
	Total	71.8	6.2	43.8	3.8	72.5	6.2	86.2	7.4

## Sheet: 8
Table S8 | Heterozygous SNPs in 40 avian species
Latin names	Conservation status	# of SNPs	SNP rate (10-3)	# of Non-synonymous SNPs	# of synonymous SNPs	NS/S
Nipponia nippon	EN	478836	0.43	2406	3465	0.69
Balearica regulorum	EV	1996436	1.88	5369	10539	0.51
Chlamydotis macqueenii	EV	2755985	2.67	6843	13985	0.49
Haliaeetus albicilla	EV	429933	0.4	1642	2057	0.8
Haliaeetus leucocephalus	EV	476460	0.43	2250	2667	0.84
Mesitornis unicolor	EV	1386012	1.34	5390	9008	0.6
Nestor notabilis	EV	900391	0.91	3192	5063	0.63
Pelecanus crispus	EV	652406	0.6	2694	3221	0.84
Acanthisitta chloris	LC	1631045	1.67	4309	8281	0.52
Anas platyrhynchos	LC	2917640	2.91	8219	26490	0.31
Apaloderma vittatum	LC	2196131	2.18	6147	10567	0.58
Calypte anna	LC	2305206	2.55	6577	14754	0.45
Caprimulgus carolinensis	LC	4134396	3.87	9566	19634	0.49
Cariama cristata	LC	2705802	2.55	6243	12326	0.51
Cathartes aura	LC	1087091	1.18	3240	5589	0.58
Charadrius vociferus	LC	3392281	3.05	8387	19311	0.43
Colius striatus	LC	2898272	2.84	6319	12454	0.51
Columba livia	LC	1742895	1.72	5093	12245	0.42
Corvus brachyrhynchos	LC	1695667	1.72	7536	12362	0.61
Cuculus canorus	LC	5626221	5.42	11804	32238	0.37
Egretta garzetta	LC	2683899	2.51	6038	14835	0.41
Eurypyga helias	LC	3492244	3.46	9051	19815	0.46
Falco peregrinus	LC	1094615	1.01	3388	6332	0.54
Fulmarus glacialis	LC	2244766	2.06	6129	11287	0.54
Gavia stellata	LC	2371415	2.24	5530	9901	0.56
Geospiza fortis	LC	1053816	1.1	4812	9899	0.49
Leptosomus discolor	LC	2648923	2.47	6277	12946	0.48
Manacus vitellinus	LC	3826080	4.02	9336	23304	0.4
Melopsittacus undulatus	LC	4316449	4.31	11698	36019	0.32
Merops nubicus	LC	3641719	3.67	7488	18526	0.4
Opisthocomus hoazin	LC	2495191	2.29	10564	15680	0.67
Phaethon lepturus	LC	1581419	1.5	4244	6563	0.65
Phalacrocorax carbo	LC	1416666	1.39	3479	6073	0.57
Phoenicopterus ruber	LC	3542785	3.34	7362	14366	0.51
Picoides pubescens	LC	4008877	3.9	8684	20511	0.42
Podiceps cristatus	LC	2174676	2.08	5448	8980	0.61
Pterocles guturalis	LC	1449156	1.46	4478	6742	0.66
Struthio camelus	LC	1915423	1.71	5078	8688	0.58
Tauraco erythrolophus	LC	2676542	2.48	6938	13050	0.53
Tyto alba	LC	1252107	1.25	3391	6336	0.54

## Sheet: 9
Table S9 | Resequencing summary of the 8 crested ibis and the 5 little egret individual animals
Species	ID	Library	Raw bases (Mb)	Clean base (Mb)	Depth (clean data)	Mapped base (Mb)	High map quality base (Mb)
crested ibis	550 F1	SZAIPI003458	30096	24916	19.9	23564	22496
	554M1	SZAIPI003464	30027	24019	19.2	22674	21783
	617C1	SZAIPI003459	29770	23513	18.8	22343	21325
	518F2	SZAIPI003465	30234	24486	19.6	23271	22335
	362M2	SZAIPI003463	36456	28850	23.1	27307	25994
	614C2	SZAIPI003460	31044	24700	19.8	23516	22287
	F-C1	SZAIPI003461	31221	25419	20.3	23974	22862
	B4-1272	SZAIPI003462	30795	24244	19.4	22962	21656
little egret	ec02	SZAIPI003276	34060	30511	24.4	29641	27908
	ec03	SZAIPI003275	34223	28919	23.1	27893	25128
	ec04	SZAIPI003274	34296	29406	23.5	28550	26364
	ec05	SZAIPI003273	33690	30241	24.2	29152	27261
	ec06	SZAIPI003272	33382	29561	23.6	28536	26575

## Sheet: 10
Table S10 | SNPs of the crested ibis and the little egret
Species	Sample ID	# of SNPs	SNP rate (10-3)	# of Synonymous SNPs	# of Nonsynonymous SNPs	NS/S	P value (ttest) 8 ibis versu 5 egret
crested ibis	550 F1	585663	0.57	3990	2636	0.66	7.11954e-13
	554M1	620175	0.6	4264	2872	0.67
	617C1	584801	0.57	3796	2590	0.68
	518F2	606860	0.59	3886	2682	0.69
	362M2	691513	0.66	4373	2892	0.66
	614C2	521579	0.5	3244	2280	0.7
	F-C1	624902	0.6	4267	2838	0.67
	B41272	590870	0.57	3702	2508	0.68
	Total	1188930	-	7991	5468	0.68
little egret	ec02	4107223	4.1	28773	13113	0.46
	ec03	4046402	4	28098	12471	0.44
	ec04	4032893	4	28187	12666	0.45
	ec05	4104101	4.1	28640	13268	0.46
	ec06	4111073	4.08	28855	13290	0.46
	Total	8876153	-	61949	29871	0.48

[truncated: 10 more sheets: 11, 12, 13, 14, 15, 16, 17, 18, 19, 20]
